# Supplementary material for: In silico re-engineering of a neurotransmitter to activate KCNQ potassium channels in an isoform-specific manner
Source: PubMed Central journal article supplement (PMC6825221; doi:10.1038/s42003-019-0648-3), 2019-11-01
Supplement: 42003_2019_648_MOESM1_ESM.pdf [file 42003_2019_648_MOESM1_ESM.pdf]

## Supplementary Figures

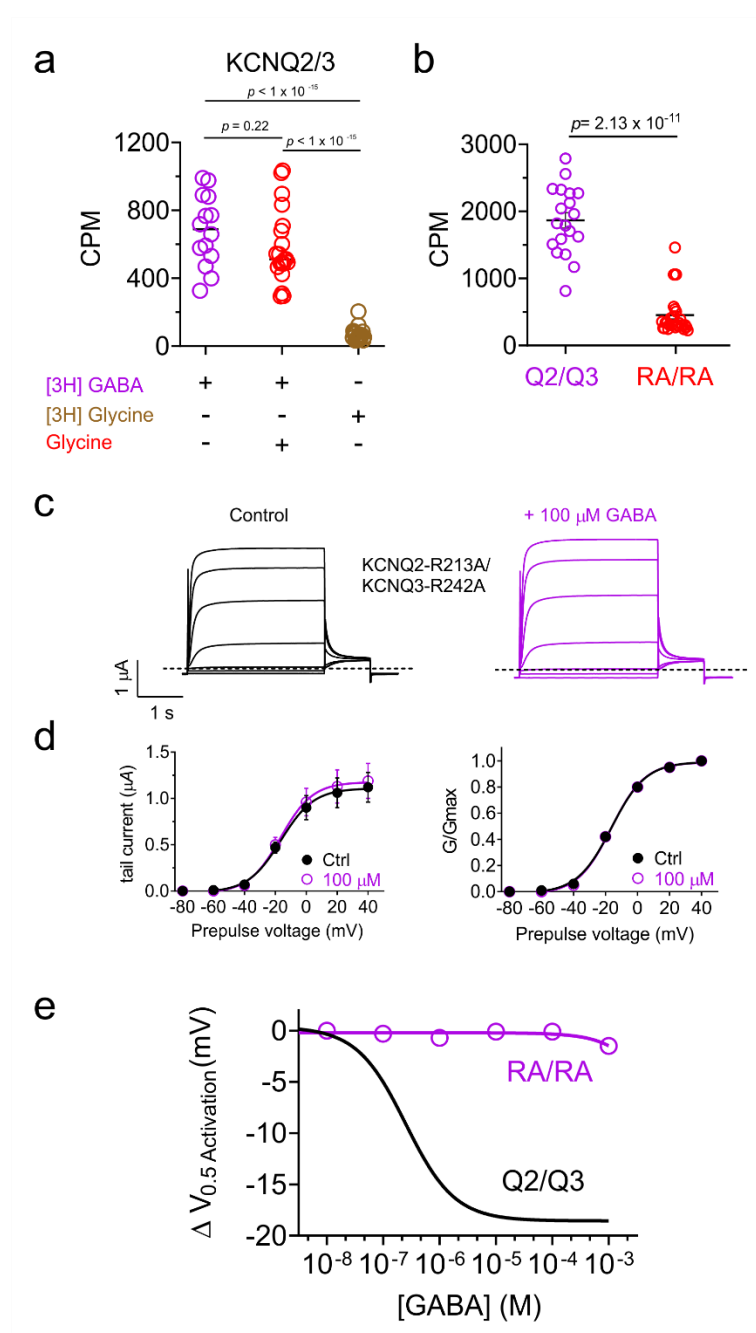

**Supplementary Figure 1. GABA, 2FPG and 3FMSG utilize a similar KCNQ binding pocket that disallows glycine binding**

All error bars indicate SEM.

- a. [<sup>3</sup>H]GABA or [<sup>3</sup>H]glycine binding quantified in counts per minute (CPM, measured over 30 minutes) for oocytes expressing KCNQ2/3 in the absence or presence of cold glycine as indicated;  $n = 15-20$ . Each point = 1 oocyte.
- b. [<sup>3</sup>H]GABA quantified in counts per minute (CPM, measured over 30 minutes) for oocytes expressing wild-type KCNQ2/3 (Q2/Q3) or KCNQ2-R213A/KCNQ3-R242 (RA/RA) as indicated;  $n = 19-29$ . Each point = 1 oocyte.
- c. Functional effects of KCNQ2-R213A/KCNQ3-R242 mutations on KCNQ2/3 heteromeric channel GABA sensitivity. Mean traces shown in the absence (Control) or presence of GABA (100  $\mu$ M);  $n = 5$ .
- d. Mean raw tail current and normalized tail current ( $G/G_{max}$ ) for traces as in panel c;  $n = 5$ .
- e. GABA concentration versus the induced shift in  $V_{0.5 \text{ Activation}}$  for wild-type KCNQ2/3 (Q2/Q3) (data from Figure 1e) versus KCNQ2-R213A/KCNQ3-R242 (RA/RA);  $n = 5$ .

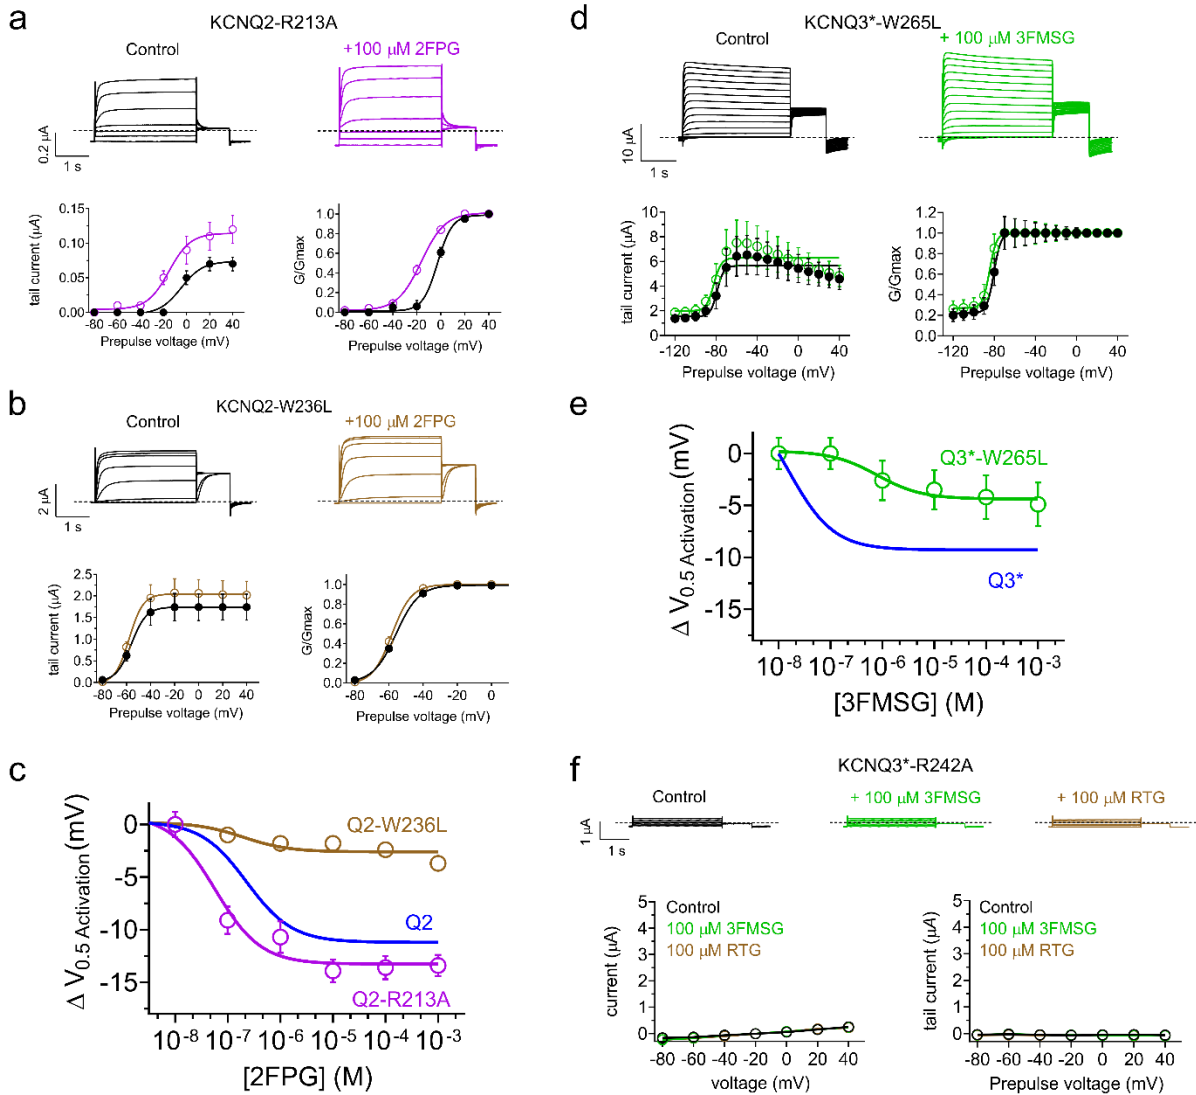

**Supplementary Figure 2. Effects of mutations on homomeric channel sensitivity to 2FPG and 3FMSG**

All error bars indicate SEM.

- Mean traces, raw tail current and G/Gmax showing effects of 2FPG (100  $\mu$ M) on KCNQ2-R213A ( $n = 4$ ).
- Mean traces, raw tail current and G/Gmax showing effects of 2FPG (100  $\mu$ M) on KCNQ2-W236L ( $n = 5$ ).

- c. 2FPG concentration versus the induced shift in  $V_{0.5 \text{ Activation}}$  for wild-type KCNQ2 (Q2) (data from Figure 4c) versus Q2-R213A and Q2-W236L;  $n = 4-5$ .
- d. Mean traces, mean raw tail current and  $G/G_{\text{max}}$  showing effects of 3FMSG (100  $\mu\text{M}$ ) on KCNQ3\*-W265L ( $n = 5$ ).
- e. 3FMSG concentration versus the induced shift in  $V_{0.5 \text{ Activation}}$  for wild-type KCNQ3\* (Q3\*) (data from Figure 4i) versus Q3\*-W265L;  $n = 5$ .
- f. Mean traces, mean raw prepulse current and raw tail current showing lack of effects of 3FMSG or retigabine (100  $\mu\text{M}$ ) on the nonfunctional KCNQ3\*-R242A channel ( $n = 5$ ).
